# Supplementary material for: Enhanced Recovery of Zn from Carbonate-Type Mixed Oxidized Ore (CMO) by Combining Organic Acid Leaching with Mechanical Activation
Source: MDPI journal article supplement (doi:10.3390/met13061021), 2023-05-26
Supplement: s1 [file s1]

## **Supporting Information**

### **Enhanced Recovery of Zn from carbonate-type mixed oxidized ore (CMO) by combining organic acid leaching with mechanical activation**

Hao Deng<sup>1</sup>, Xuelin Pan<sup>1</sup>, Fanyun Chen<sup>1</sup>, Qingshan Gao<sup>1</sup>, Chen Tian<sup>1,2,\*</sup>, Zhang Lin<sup>1,2</sup>

*1. School of Metallurgy and Environment, Central South University, Changsha, Hunan 410083, China*

*2. Chinese National Engineering Research Center for Control & Treatment of Heavy Metal Pollution, Changsha, Hunan 410083, China*

*\* Corresponding author*

Table S1. Parameter levels and coded values used in the experimental design.

| <b>Factors</b>   | <b>Code</b> | <b>+ 2</b> | <b>+ 1</b> | <b>0</b> | <b>− 1</b> | <b>− 2</b> |
|------------------|-------------|------------|------------|----------|------------|------------|
| Time (h)         | A           | 30         | 45         | 60       | 75         | 90         |
| Conc (M)         | B           | 0.5        | 0.75       | 1        | 1.25       | 1.5        |
| Temp (°C)        | C           | 30         | 45         | 60       | 75         | 90         |
| L/S ratio (mL/g) | D           | 5          | 10         | 15       | 20         | 25         |

Table S2. Brief Summary of Zn recover from low-graded Zn ores.

| No | Sources                                                                                                                                                                                                 | Leaching efficiency (%) | Optimum condition                                                                                                                                           | Ref          |
|----|---------------------------------------------------------------------------------------------------------------------------------------------------------------------------------------------------------|-------------------------|-------------------------------------------------------------------------------------------------------------------------------------------------------------|--------------|
| 1  | Pb-Zn carbonate tailing<br>( <u>Zn</u> 5%, Pb7%, Fe21%)                                                                                                                                                 | 90%                     | (1M Malic acid, 80°C, 60 min, 1/10 S/L)                                                                                                                     | [1]          |
| 3  | Pb-Zn carbonate tailing<br>( <u>Zn</u> 5%, Pb7%, Fe21%)                                                                                                                                                 | 89.3%                   | (1M Sulfuric acid, 40°C, 60 min, 1/5 S/L)                                                                                                                   | [2]          |
|    |                                                                                                                                                                                                         | 74.7%                   | (0.5M Citric acid, 60°C, 120 min, 1/10 S/L)                                                                                                                 |              |
| 4  | Mixed sulfide–oxide lead and zinc ore<br>( <u>Zn</u> S23.6%, <u>Zn</u> CO <sub>3</sub> 10.1%, PbS12.3%,<br>FeS <sub>2</sub> 12%, CaCO <sub>3</sub> 35.3%, SiO <sub>2</sub> 12.3%)                       | 94.9%                   | (0.25 M (NH <sub>4</sub> ) <sub>2</sub> SO <sub>4</sub> + 0.5 M (NH <sub>4</sub> ) <sub>2</sub> S <sub>2</sub> O <sub>8</sub> ,<br>50°C, 240 min, 1/10 S/L) | [3]          |
| 5  | Low-grade zinc carbonate source<br>(Ca12.2% Si12% <u>Zn</u> 7.65% Fe6.08%<br>Al4.13% Pb1.04% Mg1.10%<br>Na1.04%)                                                                                        | 90%                     | (1M Glycine, pH = 9.5, 70°C, 240 min,<br>1/10 S/L)                                                                                                          | [4]          |
| 6  | Pb-Zn carbonate tailing<br>( <u>Zn</u> 5%, Pb7%, Fe21%)                                                                                                                                                 | 91%                     | (1 M Sulfuric acid, 40 °C, 30 min, 2/10<br>S/L )                                                                                                            | [5]          |
|    |                                                                                                                                                                                                         | 90.6%                   | (1 M Citric acid, 80 °C, 180 min, 2/10 S/L)                                                                                                                 |              |
|    |                                                                                                                                                                                                         | 90%                     | (0.5 M Hydrochloric, 80 °C, 30 min, 1/10<br>S/L)                                                                                                            |              |
|    |                                                                                                                                                                                                         | 90%                     | (1 M Malic acid, 80 °C, 60 min, 1/10 S/L)                                                                                                                   |              |
|    |                                                                                                                                                                                                         | 88.7%                   | (1 M Sulfosalicylic acid; 80 °C, 30 min,<br>1/10 S/L)                                                                                                       |              |
|    |                                                                                                                                                                                                         | 82.6%                   | (1 M Formic acid, 60 °C, 180 min, 1/10<br>S/L)                                                                                                              |              |
| 7  | Mixed sulfide–oxide lead and zinc ore<br>( <u>Zn</u> S21.94%, <u>Zn</u> CO <sub>3</sub> 14.07%,<br>PbCO <sub>3</sub> 8.09%, FeS <sub>2</sub> 5.61%,<br>CaCO <sub>3</sub> 3.21%, SiO <sub>2</sub> 7.35%) | 90.07%                  | (1 M Lactic acid, 75 °C, 75 min, 1/20 S/L)                                                                                                                  | This<br>work |

Table S3. Experiment design.

| Run | Time<br>(min) | Conc<br>(M) | Temperature<br>(°C) | Liquid/solid ratio<br>(mL/g) | Leaching efficiency of Zn<br>(%) |
|-----|---------------|-------------|---------------------|------------------------------|----------------------------------|
| 1   | 75            | 1.25        | 45                  | 20                           | 38.70                            |
| 2   | 60            | 1           | 30                  | 15                           | 23.03                            |
| 3   | 60            | 1           | 60                  | 15                           | 38.48                            |
| 4   | 45            | 1.25        | 75                  | 20                           | 46.10                            |
| 5   | 90            | 1           | 60                  | 15                           | 39.03                            |
| 6   | 75            | 0.75        | 45                  | 10                           | 25.47                            |
| 7   | 45            | 0.75        | 45                  | 20                           | 28.81                            |
| 8   | 60            | 1           | 60                  | 15                           | 37.32                            |
| 9   | 60            | 1.5         | 60                  | 15                           | 36.84                            |
| 10  | 60            | 0.5         | 60                  | 15                           | 25.90                            |
| 11  | 75            | 1.25        | 75                  | 20                           | 46.15                            |
| 12  | 75            | 0.75        | 45                  | 20                           | 34.88                            |
| 13  | 75            | 1.25        | 75                  | 10                           | 40.10                            |
| 14  | 60            | 1           | 60                  | 5                            | 26.10                            |
| 15  | 30            | 1           | 60                  | 15                           | 34.65                            |
| 16  | 75            | 1.25        | 45                  | 10                           | 27.74                            |
| 17  | 45            | 0.75        | 75                  | 10                           | 30.39                            |
| 18  | 60            | 1           | 60                  | 15                           | 34.92                            |
| 19  | 60            | 1           | 60                  | 15                           | 35.02                            |
| 20  | 60            | 1           | 90                  | 15                           | 43.93                            |
| 21  | 45            | 0.75        | 75                  | 20                           | 43.02                            |
| 22  | 60            | 1           | 60                  | 15                           | 37.96                            |
| 23  | 75            | 0.75        | 75                  | 20                           | 42.29                            |
| 24  | 45            | 1.25        | 45                  | 20                           | 29.59                            |
| 25  | 45            | 0.75        | 45                  | 10                           | 16.32                            |
| 26  | 60            | 1           | 60                  | 25                           | 47.10                            |
| 27  | 45            | 1.25        | 75                  | 10                           | 36.35                            |
| 28  | 45            | 1.25        | 45                  | 10                           | 24.86                            |
| 29  | 60            | 1           | 60                  | 15                           | 32.75                            |
| 30  | 75            | 0.75        | 75                  | 10                           | 31.39                            |

Table S4. Fit Summary.

| Source           | Sequential p-value | Lack of Fit p-value | Adjusted R <sup>2</sup> | Predicted R <sup>2</sup> |                  |
|------------------|--------------------|---------------------|-------------------------|--------------------------|------------------|
| Linear           | < 0.0001           | 0.3806              | 0.8889                  | 0.8618                   |                  |
| 2FI              | 0.2770             | 0.4178              | 0.8979                  | 0.8424                   |                  |
| <b>Quadratic</b> | <b>0.0166</b>      | <b>0.7867</b>       | <b>0.9396</b>           | <b>0.8828</b>            | <b>Suggested</b> |
| Cubic            | 0.8619             | 0.4106              | 0.9140                  | 0.0842                   | Aliased          |

Table S5. ANOVA for Quadratic model.

| Source                                                                                                                            | Sum of squares | df | Mean Square | F-value | p-value                |
|-----------------------------------------------------------------------------------------------------------------------------------|----------------|----|-------------|---------|------------------------|
| <b>Model</b>                                                                                                                      | 1626.41        | 13 | 125.11      | 38.16   | < 0.0001 significant   |
| A-Time                                                                                                                            | 66.70          | 1  | 66.70       | 20.34   | 0.0004                 |
| B-Conce                                                                                                                           | 144.51         | 1  | 144.51      | 44.07   | < 0.0001               |
| C-Temp                                                                                                                            | 717.55         | 1  | 717.55      | 218.85  | < 0.0001               |
| D-S/L                                                                                                                             | 589.24         | 1  | 589.24      | 179.72  | < 0.0001               |
| AB                                                                                                                                | 0.0059         | 1  | 0.0059      | 0.0018  | 0.9668                 |
| AC                                                                                                                                | 33.52          | 1  | 33.52       | 10.22   | 0.0056                 |
| AD                                                                                                                                | 0.3246         | 1  | 0.3246      | 0.0990  | 0.7571                 |
| BC                                                                                                                                | 2.40           | 1  | 2.40        | 0.7314  | 0.4050                 |
| BD                                                                                                                                | 12.12          | 1  | 12.12       | 3.70    | 0.0725                 |
| CD                                                                                                                                | 0.1892         | 1  | 0.1892      | 0.0577  | 0.8132                 |
| A <sup>2</sup>                                                                                                                    | 0.1570         | 1  | 0.1570      | 0.0479  | 0.8295                 |
| B <sup>2</sup>                                                                                                                    | 46.79          | 1  | 46.79       | 14.27   | 0.0016                 |
| C <sup>2</sup>                                                                                                                    | 16.44          | 1  | 16.44       | 5.01    | 0.0397                 |
| <b>Residual</b>                                                                                                                   | 52.46          | 16 | 3.28        |         |                        |
| Lack of Fit                                                                                                                       | 28.06          | 11 | 2.55        | 0.5228  | 0.8281 not significant |
| Pure Error                                                                                                                        | 24.40          | 5  | 4.88        |         |                        |
| <b>Cor Total</b>                                                                                                                  | 1678.87        | 29 |             |         |                        |
| R <sup>2</sup> = 0.9669; R <sup>2</sup> <sub>adj</sub> = 0.9543; R <sup>2</sup> <sub>pre</sub> = 0.9397; Adeq Precision = 32.6569 |                |    |             |         |                        |



Table S7. pH before and after leaching process.

|           | Lactic<br>acid | Malonic<br>acid | Citric<br>acid | Amber<br>Acid | Acetic<br>acid | Tartaric<br>acid | HCl  | HNO <sub>3</sub> | H <sub>2</sub> SO <sub>4</sub> |
|-----------|----------------|-----------------|----------------|---------------|----------------|------------------|------|------------------|--------------------------------|
| pH-Before | 2.00           | 2.00            | 2.00           | 2.00          | 2.00           | 2.00             | 2.00 | 2.00             | 2.00                           |
| pH-After  | 4.05           | 4.25            | 4.77           | 4.76          | 3.92           | 4.55             | 6.21 | 6.05             | 5.89                           |



Table S8. Chemical descriptors of organic acids.

|          | Lactic acid | Malonic acid | Citric acid | Amber Acid | Acetic acid | Tartaric acid |
|----------|-------------|--------------|-------------|------------|-------------|---------------|
| <i>E</i> | 0.29        | 0.36         | 0.66        | 0.39       | 0.18        | 0.57          |
| <i>S</i> | 0.80        | 0.66         | 1.79        | 1.23       | 0.46        | 1.43          |
| <i>A</i> | 0.94        | 1.67         | 2.79        | 1.52       | 0.66        | 1.29          |
| <i>B</i> | 0.70        | 0.78         | 1.30        | 1.04       | 0.50        | 1.05          |
| <i>V</i> | 0.67        | 0.71         | 1.27        | 0.84       | 0.47        | 0.96          |

\* The LFER descriptors used were as follows:

*E* [cm<sup>3</sup> mol<sup>-1</sup>/10]: the excess molar refraction, meaning dispersive force induced by *p/n*-electron pair interaction;

*S* [dimensionless]: dipolarity and polarizability;

*A* and *B* [dimensionless]: hydrogen bonding acidity and basicity, respectively;

*V* [cm<sup>3</sup> mol<sup>-1</sup>/100]: the McGowan characteristic molecular volume, representing cavity formation and hydrophobicity.

\*\*All data was referenced from Jong-WonChoi's work[6,7]

Note: The linear free energy relationship (LFER) model is developed to correlate leaching activity and structural properties of a chemical reactant[6-8]. 4 molecular descriptors are adopted to predict leaching performance, namely, *A* (hydrogen bonding acidity) and *B* (hydrogen bonding acidity basicity), *E* (dispersive force induced by *p/n*-electron pair interaction), *S* (dipolarity and polarizability), respectively, and *V* (McGowan characteristic molecular volume), representing cavity formation and hydrophobicity. As displayed in Table S8, Tartaric acid has the lowest leaching efficiency, but the *A* value is not the smallest. This might be the fact that the solubility of zinc tartrate is low in water ( $K_{sp} = 2.2 \times 10^{-2}$  at 20°C). Citric acid has the highest *A* among selected organic acids, but leaching efficiency is the third in comparison (35.7%). The reason is complex. Firstly, metal selection should be considered. Apart from Zn, Pb and Fe are also largely extracted by citric acid[9]. As revealed in Fig. S1, the leaching concentration of Pb and Fe are both the highest among the 6 organic acids. The competition among Zn, Fe, and Fe indicated that stronger acid strength is not preferred in single metal leaching. The selectivity could also be predicted according to complex stability constant values. The stability constant of  $\lg K_1(\text{Zn})$  is 4.71 (HL<sup>2-</sup>), but  $\lg K_1(\text{Pb})$  is 6.5, indicating poor selectivity on Zn leaching. Secondly, the steric factor influenced the solubility of the complex[10,11]. The *V* value of citric acid (1.27) is the largest among selected acids, resulting in slight solubility of zinc citrate. Lactic acid has moderated acidity, a small steric hindrance on zinc lactate, and the selectivity of zinc complex is high ( $\lg K_1(\text{Zn})=2.20$ ). Based on comprehensive analysis, lactic acid has the best performance on Zn leaching.

Table S9. Optimum conditions by RSM results.

| <b>Solution<br/>Order.</b> | <b>Time<br/>(min)</b> | <b>Lactic acid<br/>concentration<br/>(mol/L)</b> | <b>Temperature<br/>(°C)</b> | <b>Liquid/Solid<br/>ratio</b> | <b>Leaching<br/>efficiency<br/>(%)</b> | <b>Desirability</b> |
|----------------------------|-----------------------|--------------------------------------------------|-----------------------------|-------------------------------|----------------------------------------|---------------------|
| <b>1</b>                   | <b>74.95</b>          | <b>1.15</b>                                      | <b>75.00</b>                | <b>20.00</b>                  | <b>46.52</b>                           | <b>0.36</b>         |
| 2                          | 74.84                 | 1.16                                             | 75.00                       | 20.00                         | 46.51                                  | 0.36                |
| 3                          | 75.00                 | 1.15                                             | 74.98                       | 20.00                         | 46.51                                  | 0.36                |
| 4                          | 74.96                 | 1.16                                             | 74.98                       | 20.00                         | 46.51                                  | 0.36                |
| 5                          | 75.00                 | 1.14                                             | 75.00                       | 20.00                         | 46.51                                  | 0.36                |
| 6                          | 74.67                 | 1.14                                             | 75.00                       | 20.00                         | 46.51                                  | 0.36                |
| 7                          | 74.65                 | 1.17                                             | 75.00                       | 20.00                         | 46.51                                  | 0.36                |
| 8                          | 75.00                 | 1.18                                             | 75.00                       | 20.00                         | 46.50                                  | 0.36                |
| 9                          | 74.16                 | 1.14                                             | 75.00                       | 20.00                         | 46.50                                  | 0.36                |
| 10                         | 75.00                 | 1.18                                             | 75.00                       | 20.00                         | 46.50                                  | 0.36                |
| 11                         | 73.52                 | 1.15                                             | 75.00                       | 20.00                         | 46.49                                  | 0.36                |
| 12                         | 74.66                 | 1.15                                             | 75.00                       | 19.97                         | 46.49                                  | 0.36                |
| 13                         | 75.00                 | 1.18                                             | 74.87                       | 20.00                         | 46.48                                  | 0.36                |
| 14                         | 72.52                 | 1.15                                             | 75.00                       | 20.00                         | 46.48                                  | 0.36                |
| 15                         | 72.31                 | 1.17                                             | 75.00                       | 20.00                         | 46.47                                  | 0.36                |
| 16                         | 73.49                 | 1.14                                             | 74.89                       | 20.00                         | 46.47                                  | 0.36                |
| 17                         | 73.01                 | 1.12                                             | 75.00                       | 20.00                         | 46.46                                  | 0.36                |
| 18                         | 71.54                 | 1.14                                             | 75.00                       | 20.00                         | 46.46                                  | 0.36                |
| 19                         | 75.00                 | 1.20                                             | 74.99                       | 19.99                         | 46.46                                  | 0.36                |
| 20                         | 74.90                 | 1.14                                             | 74.68                       | 20.00                         | 46.46                                  | 0.36                |

Table S10. BET surface area of CMO at different rotation speed.

| <b>Rotation speed BET surface area</b> |                          |
|----------------------------------------|--------------------------|
| <b>(rpm)</b>                           | <b>(m<sup>2</sup>/g)</b> |
| 0                                      | 3.28                     |
| 200                                    | 3.46                     |
| 300                                    | 3.98                     |
| 400                                    | 4.72                     |
| 500                                    | 5.82                     |

Table S11. BET surface area of CMO at different ball/mass ratio.

| <b>Ball/mass ratio</b> | <b>BET surface area<br/>(m<sup>2</sup>/g)</b> |
|------------------------|-----------------------------------------------|
| 0                      | 3.28                                          |
| 1:1                    | 5.82                                          |
| 5:1                    | 5.35                                          |
| 10:1                   | 6.63                                          |
| 20:1                   | 2.12                                          |
| 40:1                   | 3.46                                          |

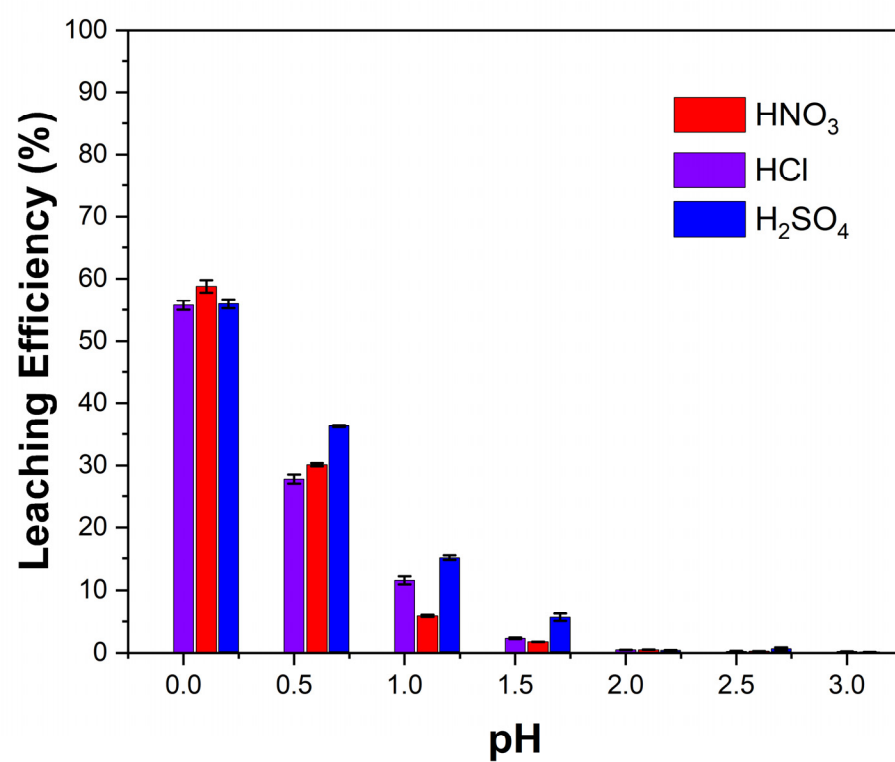

Figure S1. Inorganic acid leaching at different pH.

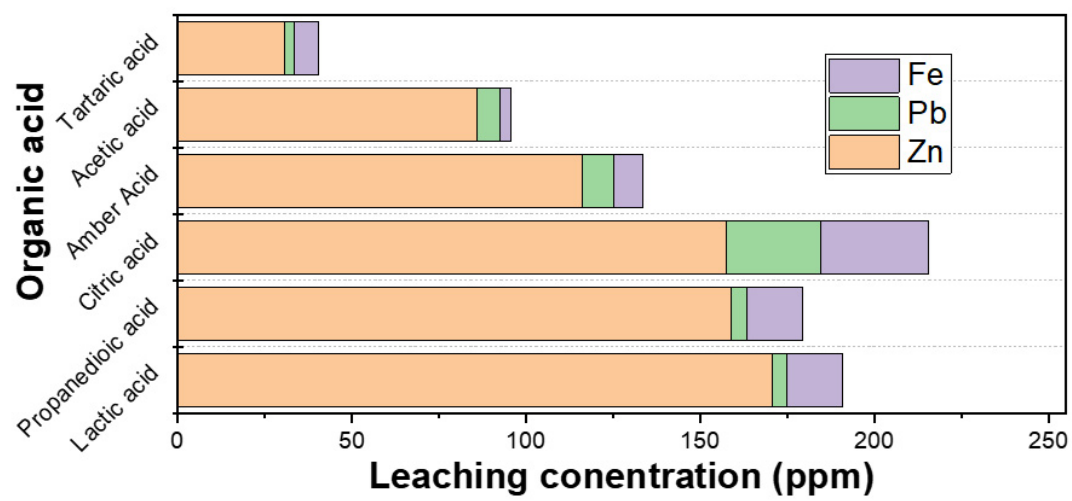

Figure S2. Organic Acid Leaching efficiency of various metal.

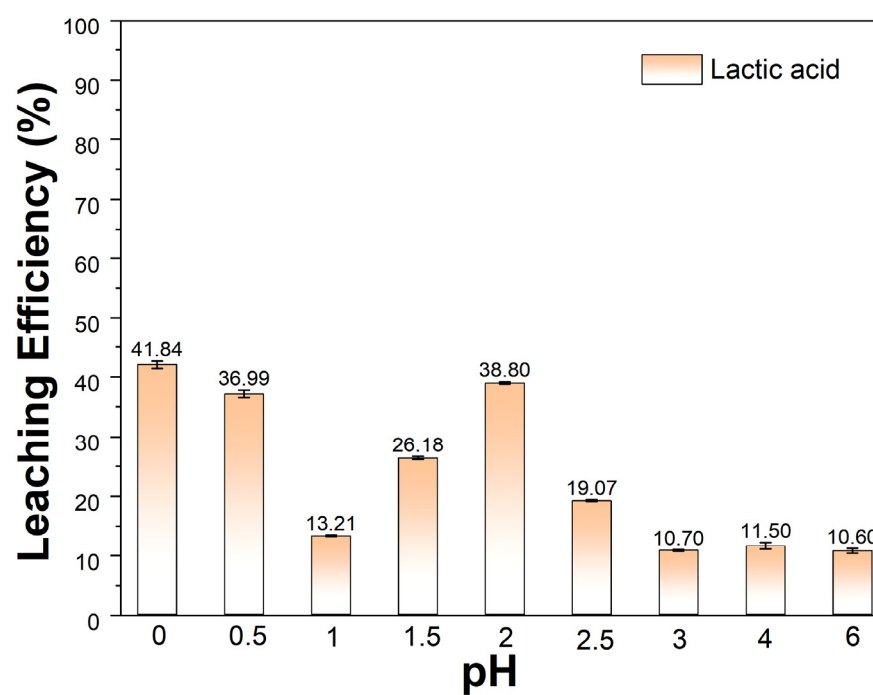

Figure S3. Lactic acid leaching at different pH [Lactic acid (1 M), Liquid/Solid ratio: 10 mL/1 g; Time: 1 h; Temperature: 60 °C].

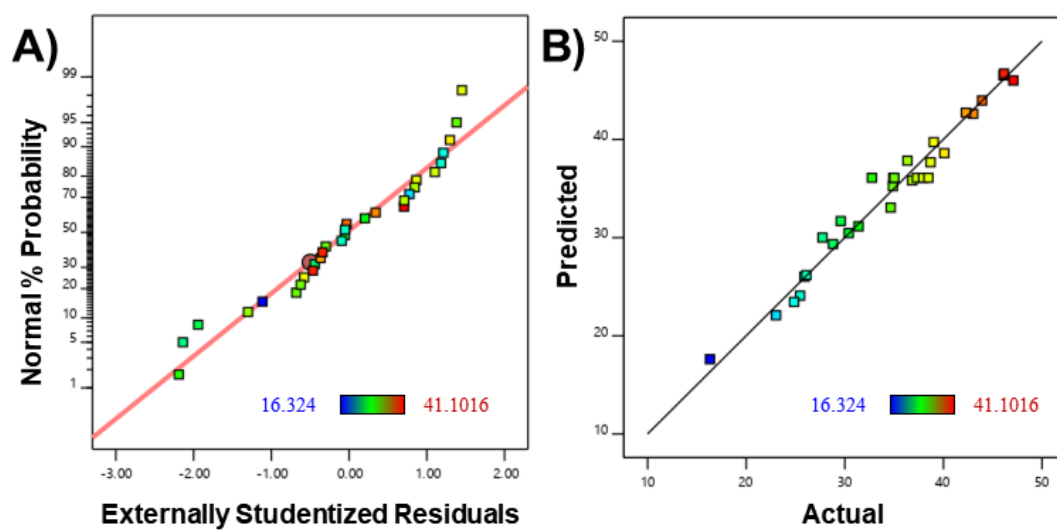

Figure S4. (a) The normal probability plot of externally studentized residuals of the predictable Zn leaching efficiency; (b) the predicted and actual response slope of Zn leaching efficiency.



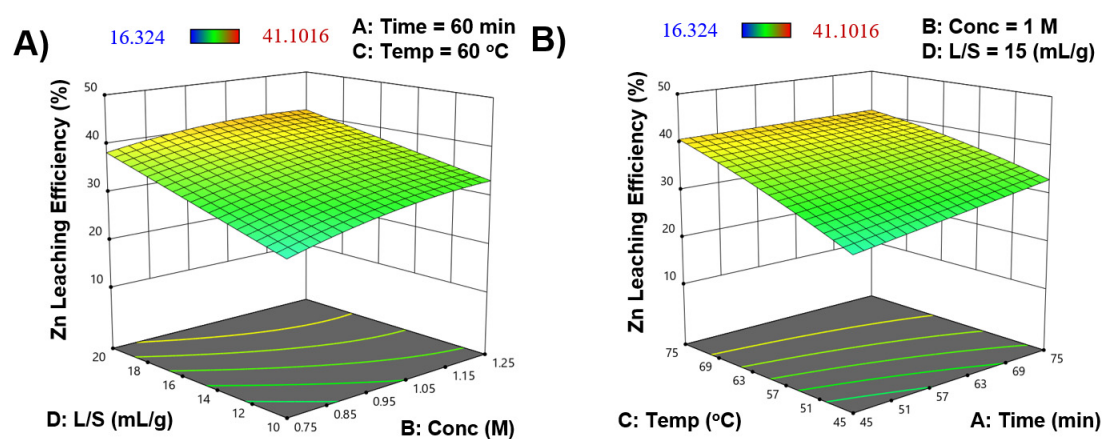

Figure S5. The 3D plot of response surface analysis: (a) L/S ratio and lactic concentration; (b) temperature and time.

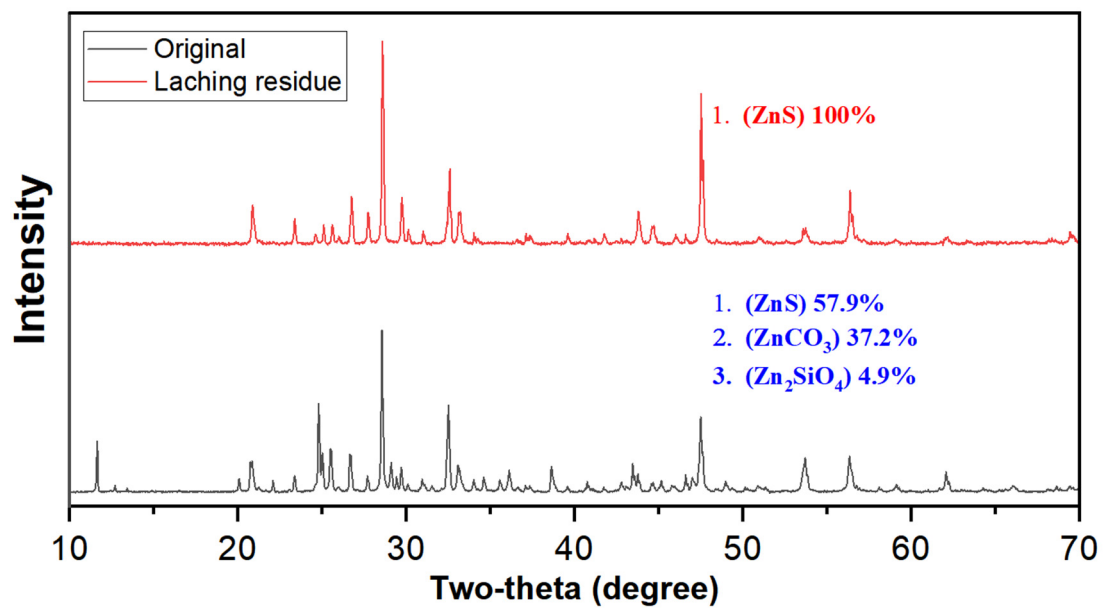

Figure S6. XRD pattern of leaching residue.

Note:

According to element composition analysis of original CMO (Table 1 and Fig 1), 63.5% of Zn speciation is in the form of sulfide, 4.7% of Zn speciation is in the form of silicate, and 31.8% of Zn is in the form of carbonate. While the XRD result of leaching residue showing that only sphalerite was found as Zn-bearing phases. By comparing phase composition between original CMO and leaching residue, it's purposed that carbonate were totally leached out (31.8% of Zn-bearing species). However, sulfide was partially leached out (36.5% of Zn-bearing species). Zn-bearing silicate was not found in XRD. Although acidic soluble, the solubility of sphalerite is extremely low at pH=2 ( $K_{sp} = 1.6 \times 10^{-24}$  [12,13]). Faced with this issue, additional pretreatment is necessary to increase the Zn leaching efficiency from sphalerite in CMO.

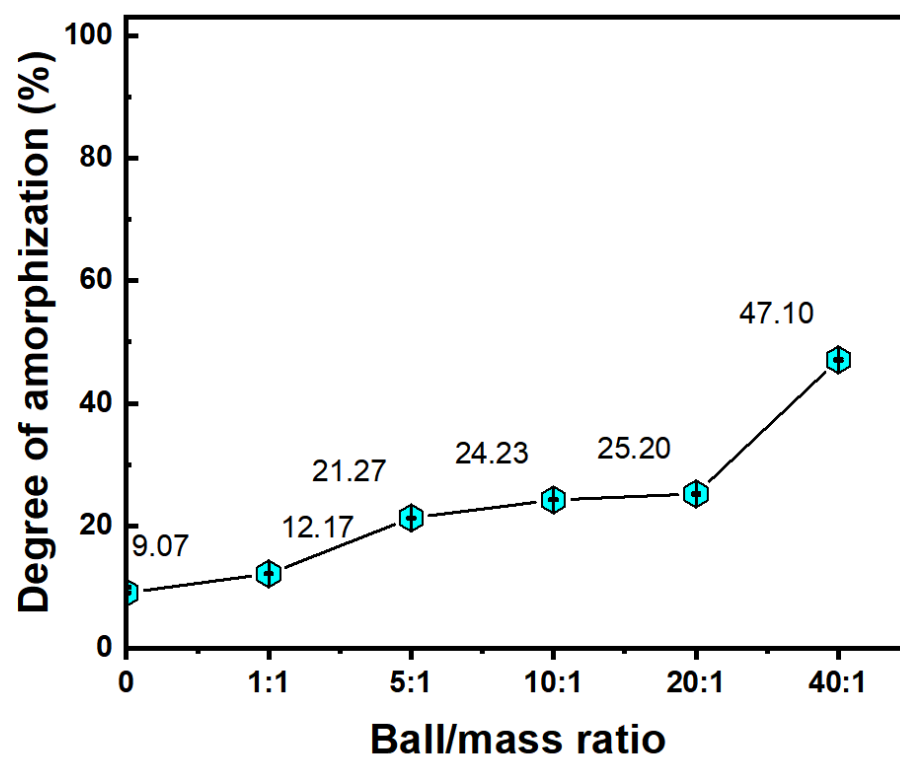

Figure S7. Degree of amorphization at different ball/mass ratio.

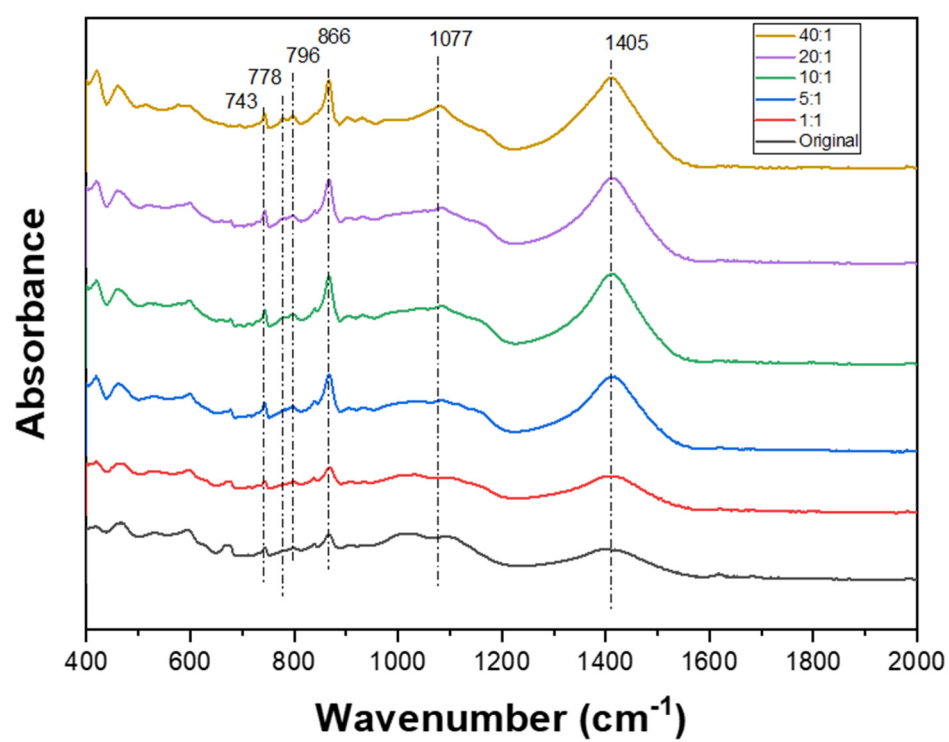

Figure S8. ATR-FTIR spectra of CMO at different ball/mass ratio.

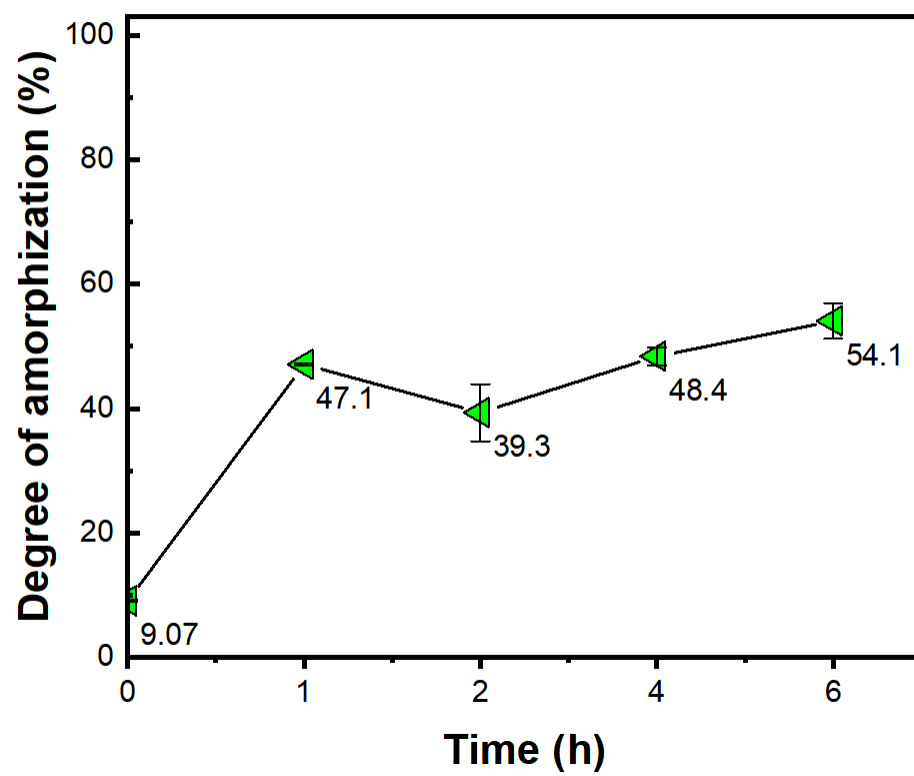

Figure S9. Degree of amorphization at different rotation time.

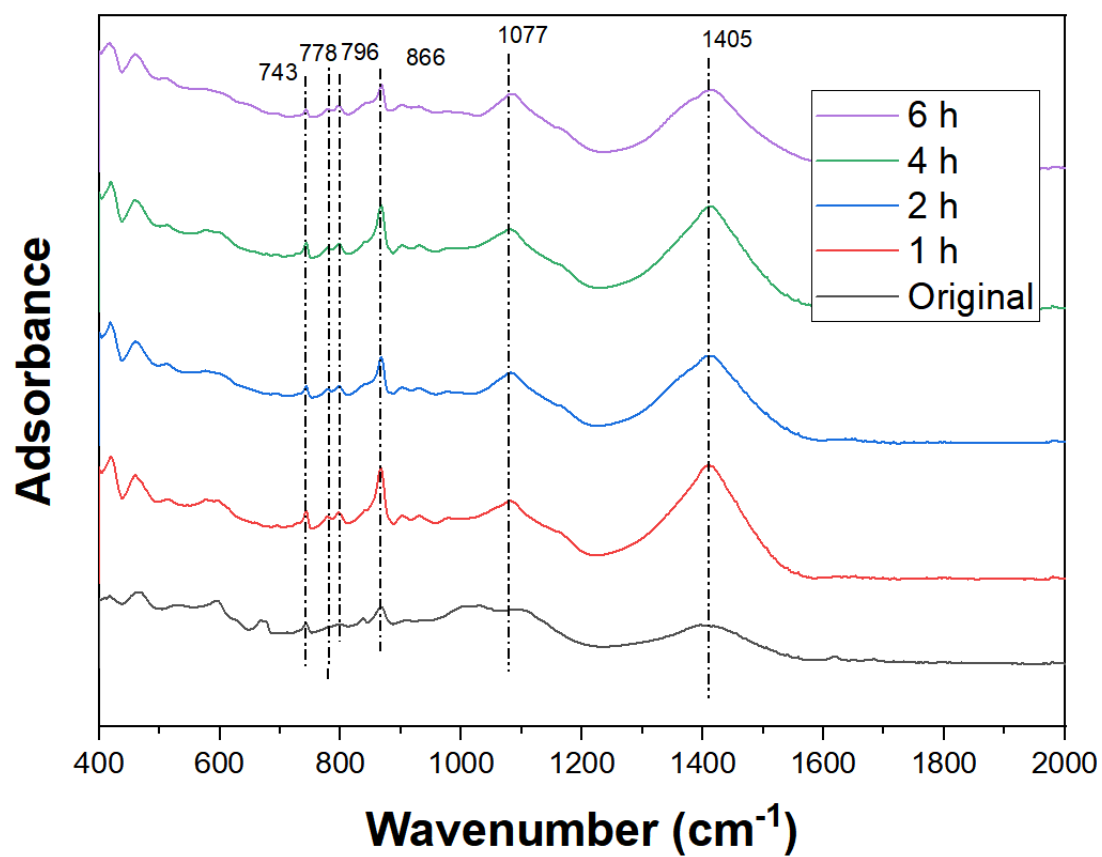

Figure S10. ATR-FTIR spectra of CMO at different time.

## Reference:

1. Hussaini, S.; Tita, A.M.; Kursunoglu, S.; Top, S.; Ichlas, Z.T.; Kar, U.; Kaya, M. Pb-Zn recovery from a malic leach solution of a carbonate type ore flotation tailing by precipitation and solvent extraction. *Separation and Purification Technology* **2021**, *272*, 118963, doi:<https://doi.org/10.1016/j.seppur.2021.118963>.
2. Kursunoglu, S.; Kursunoglu, N.; Hussaini, S.; Kaya, M. Selection of an appropriate acid type for the recovery of zinc from a flotation tailing by the analytic hierarchy process. *Journal of Cleaner Production* **2021**, *283*, 124659, doi:<https://doi.org/10.1016/j.jclepro.2020.124659>.
3. Jia, N.; Wang, H.-g.; Zhang, M.; Guo, M. Selective and Efficient Extraction of Zinc from Mixed Sulfide-oxide Zinc and Lead Ore. *Mineral Processing and Extractive Metallurgy Review* **2016**, *37*, 418-426, doi:10.1080/08827508.2016.1233874.
4. Khodaei, H.; Fatmehsari Haghshenas, D.; Firoozi, S. Selective leaching of zinc from carbonate source using glycine as an ecofriendly lixiviant. *Minerals Engineering* **2022**, *185*, 107680, doi:<https://doi.org/10.1016/j.mineng.2022.107680>.
5. Hussaini, S.; Kursunoglu, S.; Top, S.; Ichlas, Z.T.; Kaya, M. Testing of 17-different leaching agents for the recovery of zinc from a carbonate-type Pb-Zn ore flotation tailing. *Minerals Engineering* **2021**, *168*, 106935, doi:<https://doi.org/10.1016/j.mineng.2021.106935>.
6. Choi, J.-W.; Cho, C.-W.; Yun, Y.-S. Organic acid-based linear free energy relationship models for green leaching of strategic metals from spent lithium-ion batteries and improvement of leaching performance. *Journal of Hazardous Materials* **2022**, *423*, 127214, doi:<https://doi.org/10.1016/j.jhazmat.2021.127214>.
7. Choi, J.-W.; Kim, J.; Kim, S.-K.; Yun, Y.-S. Simple, green organic acid-based hydrometallurgy for waste-to-energy storage devices: Recovery of NiMnCo<sub>2</sub>O<sub>4</sub> as an electrode material for pseudocapacitor from spent LiNiMnCoO<sub>2</sub> batteries. *Journal of Hazardous Materials* **2022**, *424*, 127481, doi:<https://doi.org/10.1016/j.jhazmat.2021.127481>.
8. Abraham, M.H.; Zhao, Y.H. Determination of Solvation Descriptors for Ionic Species: Hydrogen Bond Acidity and Basicity. *The Journal of Organic Chemistry* **2004**, *69*, 4677-4685, doi:10.1021/jo049766y.
9. Halli, P.; Hamuyuni, J.; Revitzer, H.; Lundström, M. Selection of leaching media for metal dissolution from electric arc furnace dust. *Journal of Cleaner Production* **2017**, *164*, 265-276, doi:<https://doi.org/10.1016/j.jclepro.2017.06.212>.
10. Xie, T.; Tang, J.; Geng, J.; Wang, X.; Hua, J. Balance of the steric hindrance and solubility of alkoxy ligands for ultrahigh-activity molybdenum-based butadiene coordination polymerization. *Polymer Chemistry* **2022**, *13*, 1712-1718, doi:10.1039/D1PY01402A.
11. Meng, F.; Liu, Q.; Kim, R.; Wang, J.; Liu, G.; Ghahreman, A. Selective recovery of valuable metals from industrial waste lithium-ion batteries using citric acid under reductive conditions: Leaching optimization and kinetic analysis. *Hydrometallurgy* **2020**, *191*, 105160, doi:<https://doi.org/10.1016/j.hydromet.2019.105160>.

12. Diebler, H. E. Högfeltdt (Ed.): Stability Constants of Metal-Ion Complexes, Part A: Inorganic Ligands, Vol. 21 aus: IUPAC Chemical Data Series. Pergamon Press, Oxford, New York, Toronto, Sydney, Paris, Frankfurt 1982. 310 Seiten, Preis: \$ 85.00. *Berichte der Bunsengesellschaft für physikalische Chemie* **1983**, 87, 1227-1227, doi:<https://doi.org/10.1002/bbpc.19830871236>.
13. Zhou, J.; Wu, X.; Teeter, G.; To, B.; Yan, Y.; Dhere, R.G.; Gessert, T.A. CBD-Cd<sub>1-x</sub>Zn<sub>x</sub>S thin films and their application in CdTe solar cells. *physica status solidi (b)* **2004**, 241, 775-778, doi:<https://doi.org/10.1002/pssb.200304218>.
